# Supplementary material for: Comparative Transcriptome Profiling of Resistant and Susceptible Sugarcane Cultivars in Response to Infection by Xanthomonas albilineans
Source: MDPI journal article supplement (doi:10.3390/ijms20246138), 2019-12-05
Supplement: s1 [file s1]

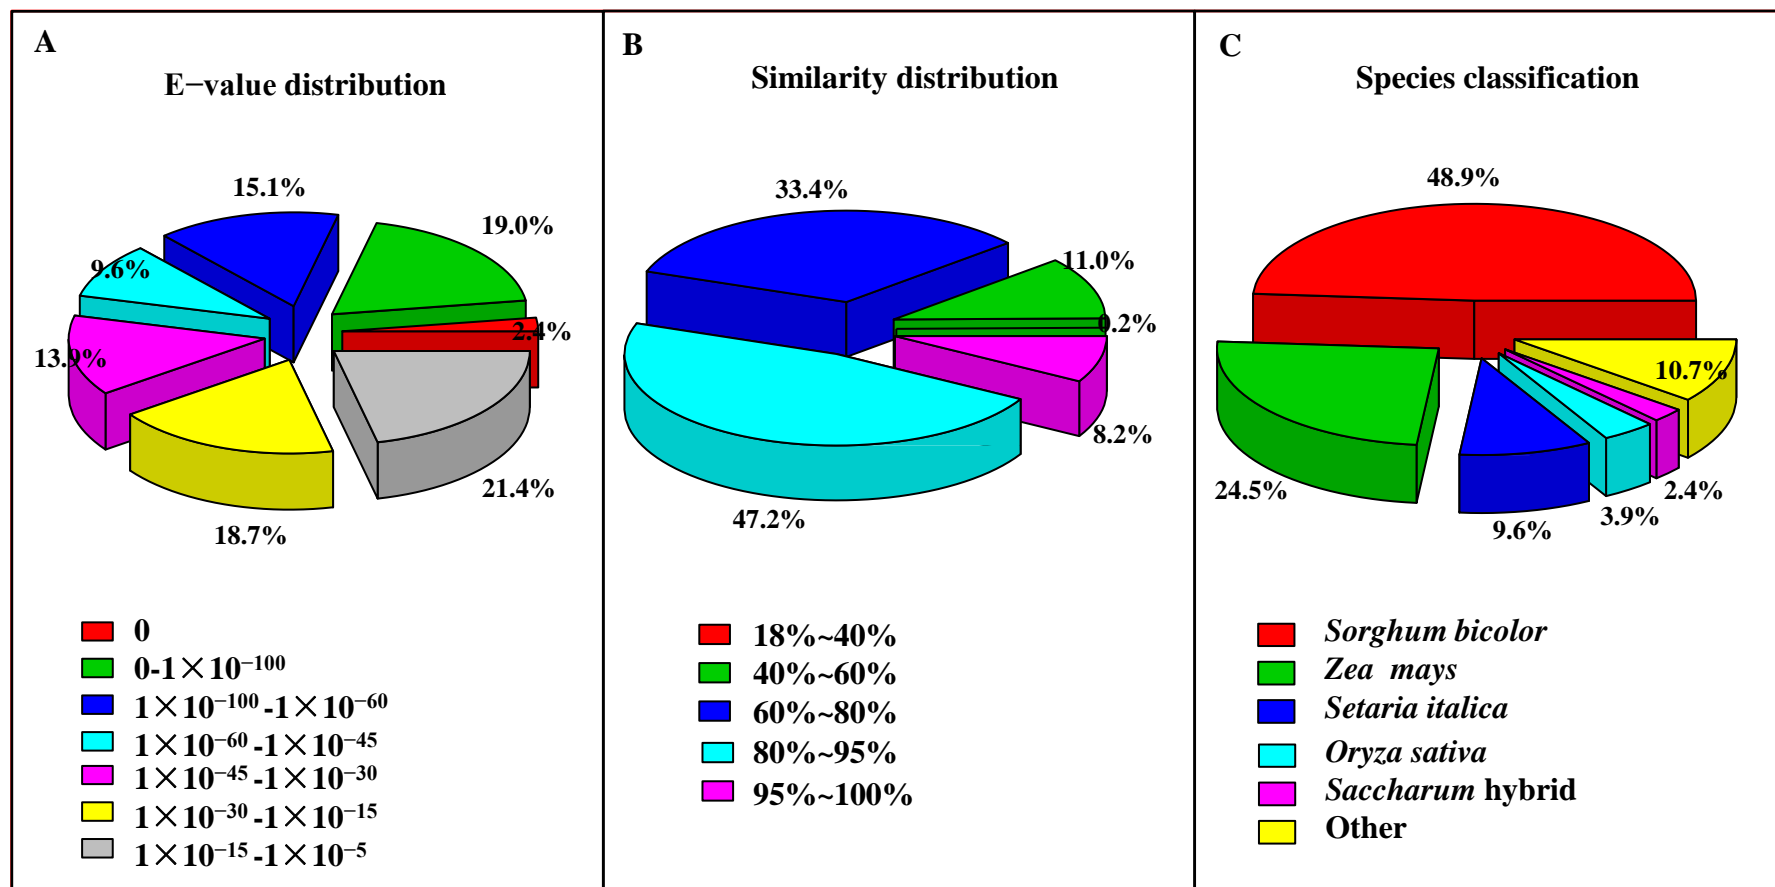

**Figure S2** Comparative analysis of sugarcane transcriptomic sequences with known Nr database sequences including *Sorghum bicolor*, *Zea mays*, *Setaria italica*, *Oryza sativa*, *Saccharum hybrid* spp., and other crops. (A) E-value distribution, (B) Similarity distribution with the Nr database, (C) Species classification of annotated unigenes.
