# Supplementary material for: Comparative Transcriptome Profiling of Resistant and Susceptible Sugarcane Cultivars in Response to Infection by Xanthomonas albilineans
Source: MDPI journal article supplement (doi:10.3390/ijms20246138), 2019-12-05
Supplement: s1 [file s1]

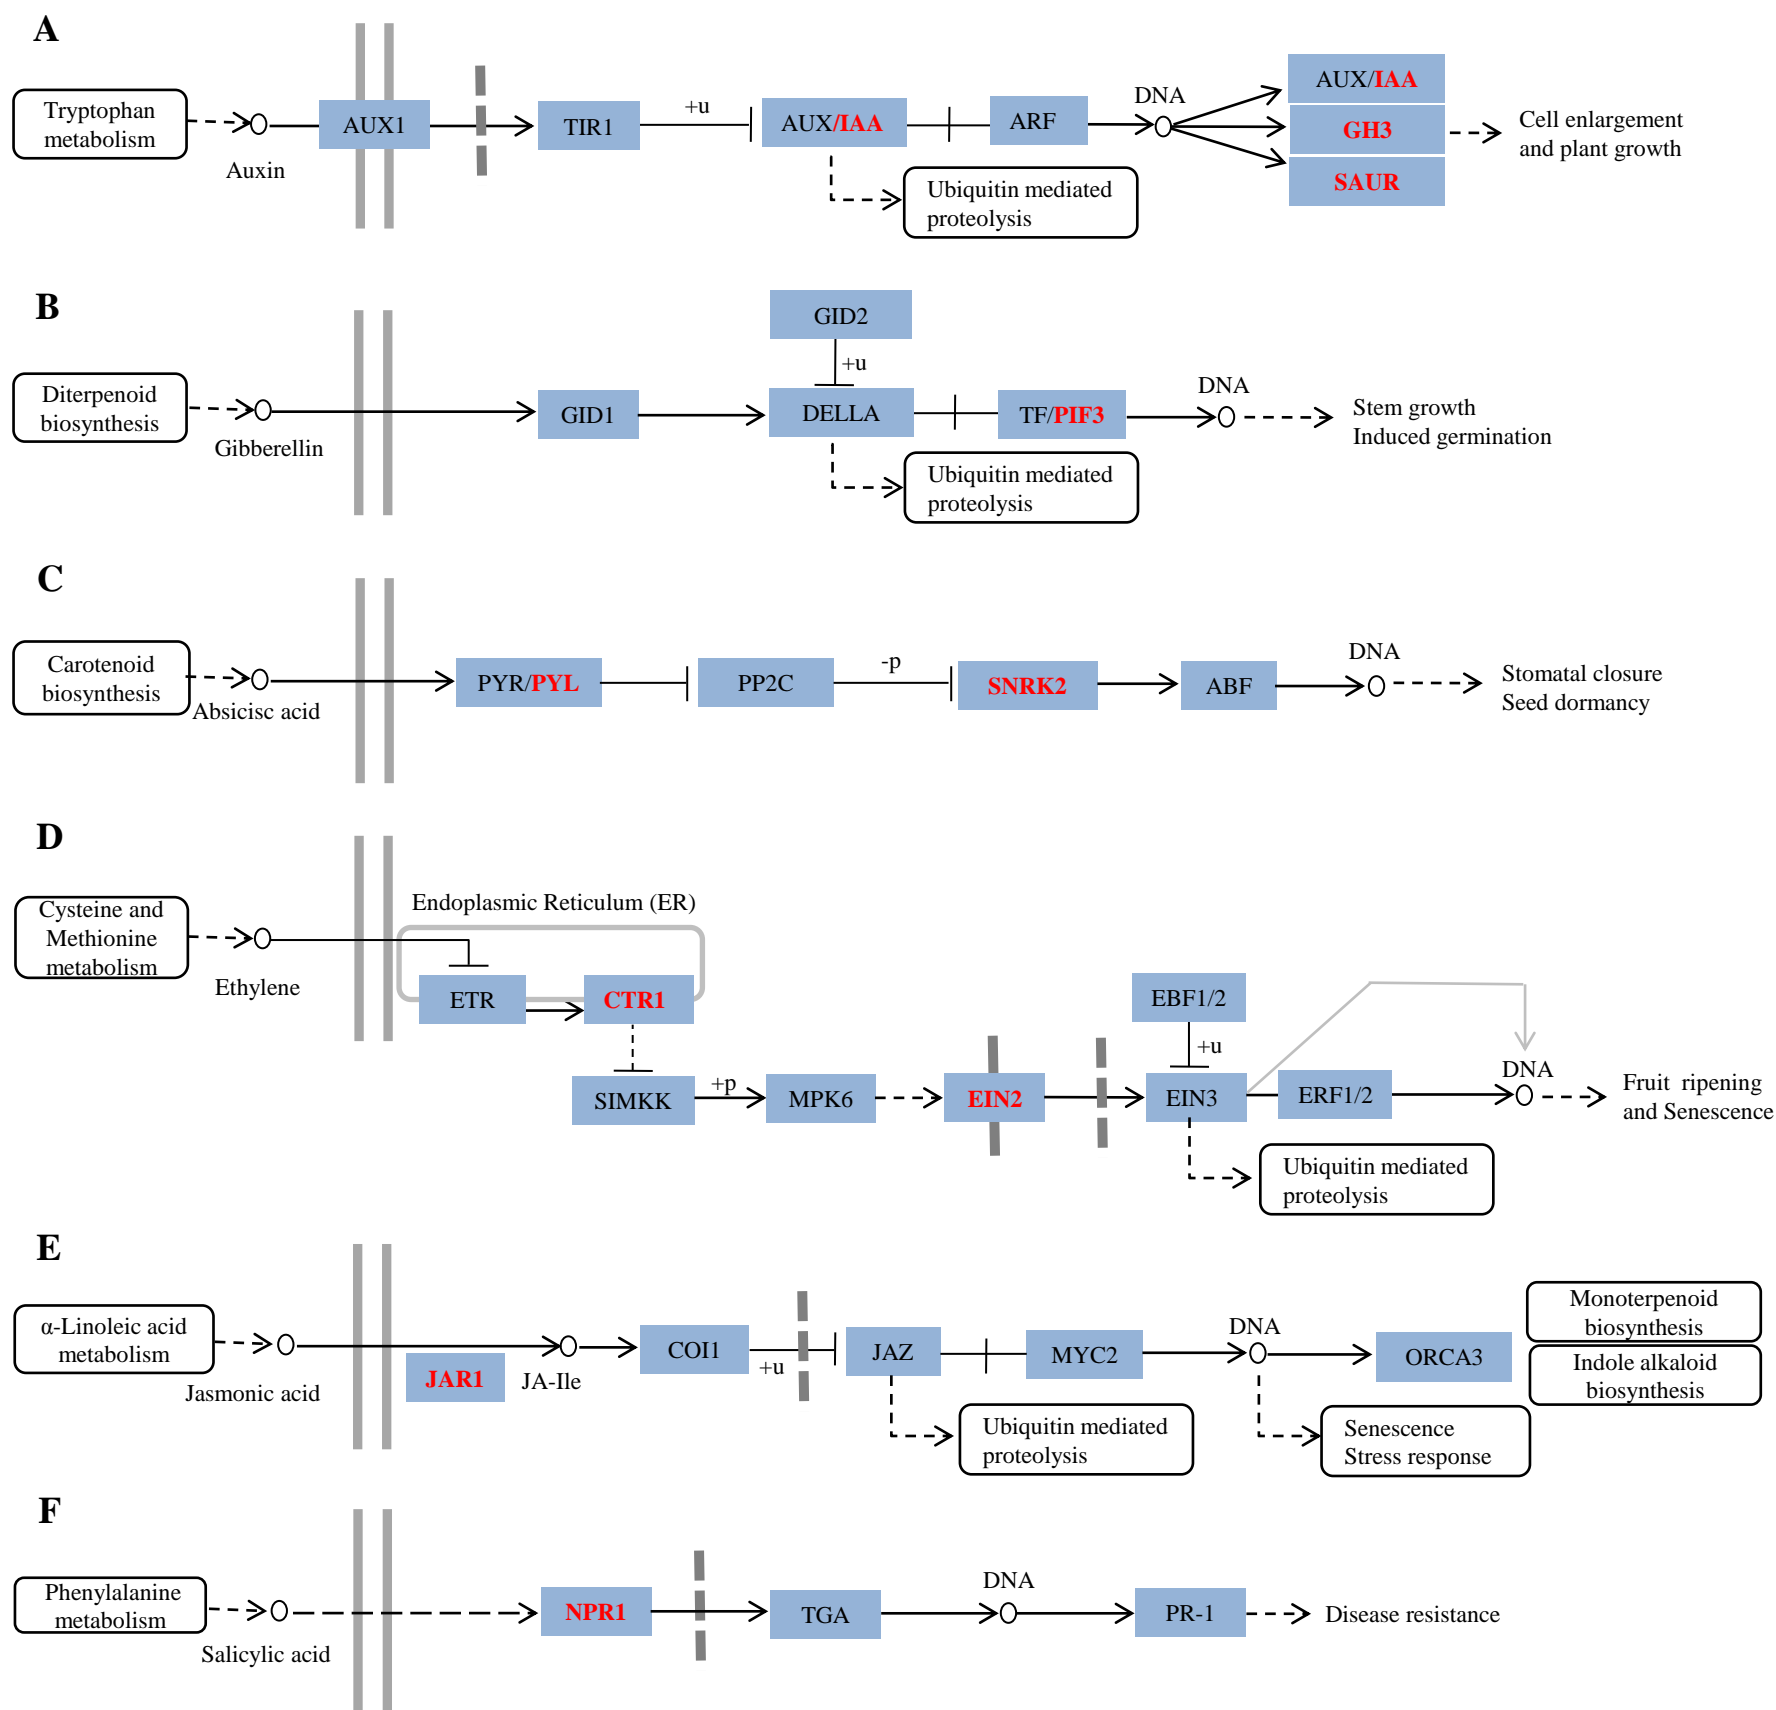

**Figure S5** Ten DEGs involved in plant hormone signal transduction pathways. The sketches of these pathways were automatically made by KEGG online (<http://www.genome.jp/kegg/>). Two solid pillars present the cytomembrane and dotted pillar presents the nuclear membrane; o, chemical molecules; +p, phosphorylation; -p, dephosphorylation; +u, ubiquitylation; -u, ubiquitylation. Selected genes that were used for validation by qRT-PCR are written in red bold.
