# Supplementary material for: Comparative Transcriptome Profiling of Resistant and Susceptible Sugarcane Cultivars in Response to Infection by Xanthomonas albilineans
Source: MDPI journal article supplement (doi:10.3390/ijms20246138), 2019-12-05
Supplement: s1 [file s1]

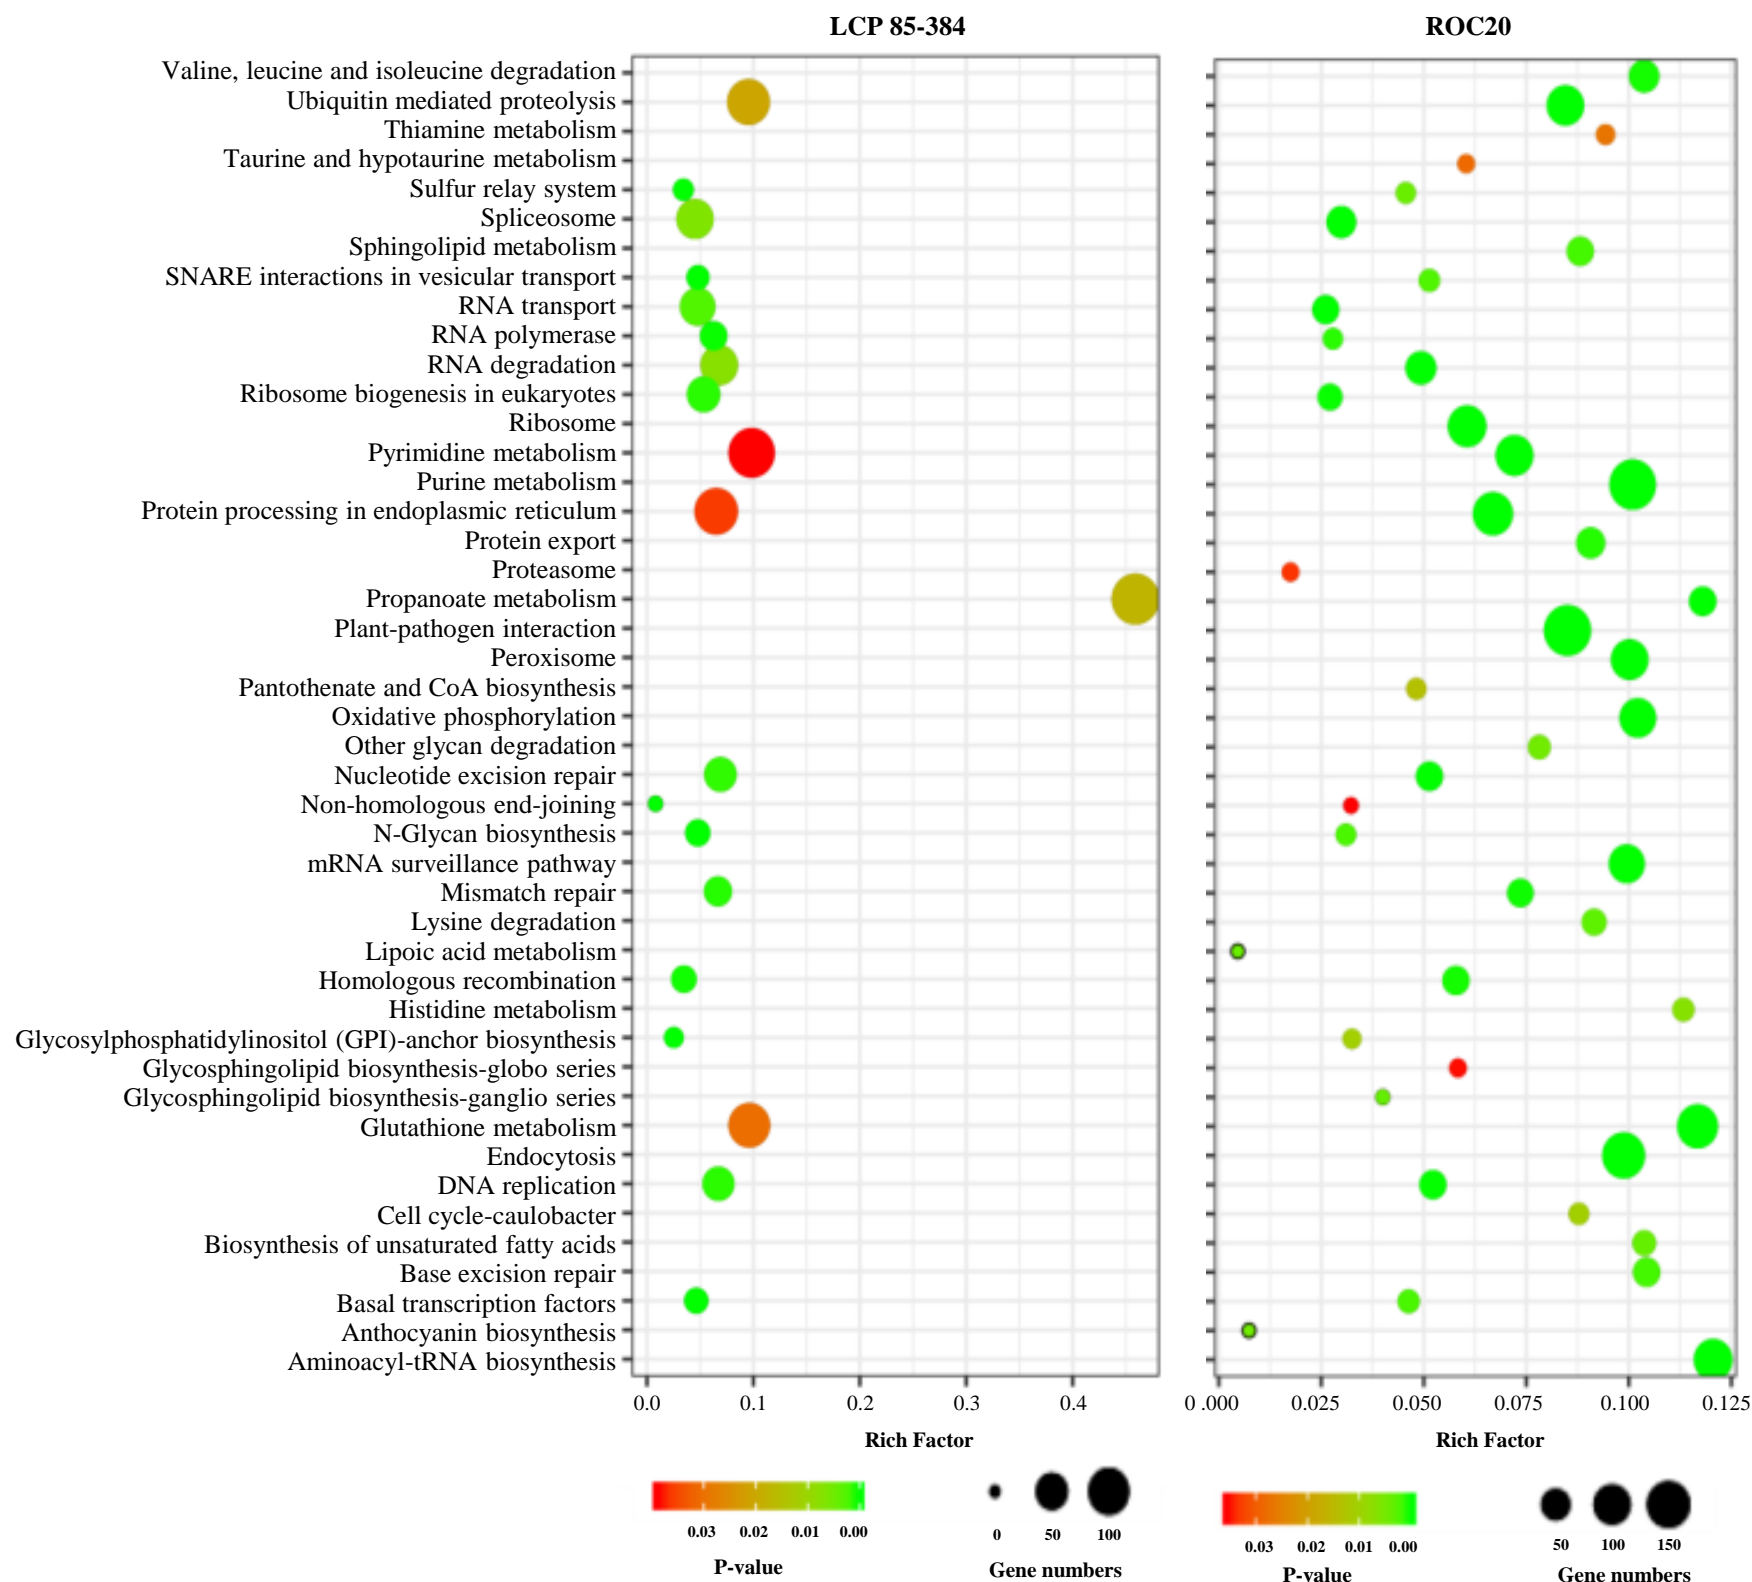

**Figure S4.** KEGG pathway classification and functional enrichment of downregulated DEGs (statistically significant  $\geq 2$ -fold, P-value  $< 0.005$ ) in LCP 83-384 (left panel) and ROC20 (right panel). The X-axis represents the enrichment factor (Rich Factor) which is the ratio of the foreground value (the number of DEGs) and the background value (total gene amount). The Y-axis shows the pathway names. A larger value of the Rich Factor indicates a higher enrichment value. The color indicates the P-value (high: red, low: green), A lower P-value refers to a more significant enrichment. Point size indicates DEG number and larger dots refer to higher numbers of DEGs.
