# Supplementary material for: Comparative Transcriptome Profiling of Resistant and Susceptible Sugarcane Cultivars in Response to Infection by Xanthomonas albilineans
Source: MDPI journal article supplement (doi:10.3390/ijms20246138), 2019-12-05
Supplement: s1 [file s1]

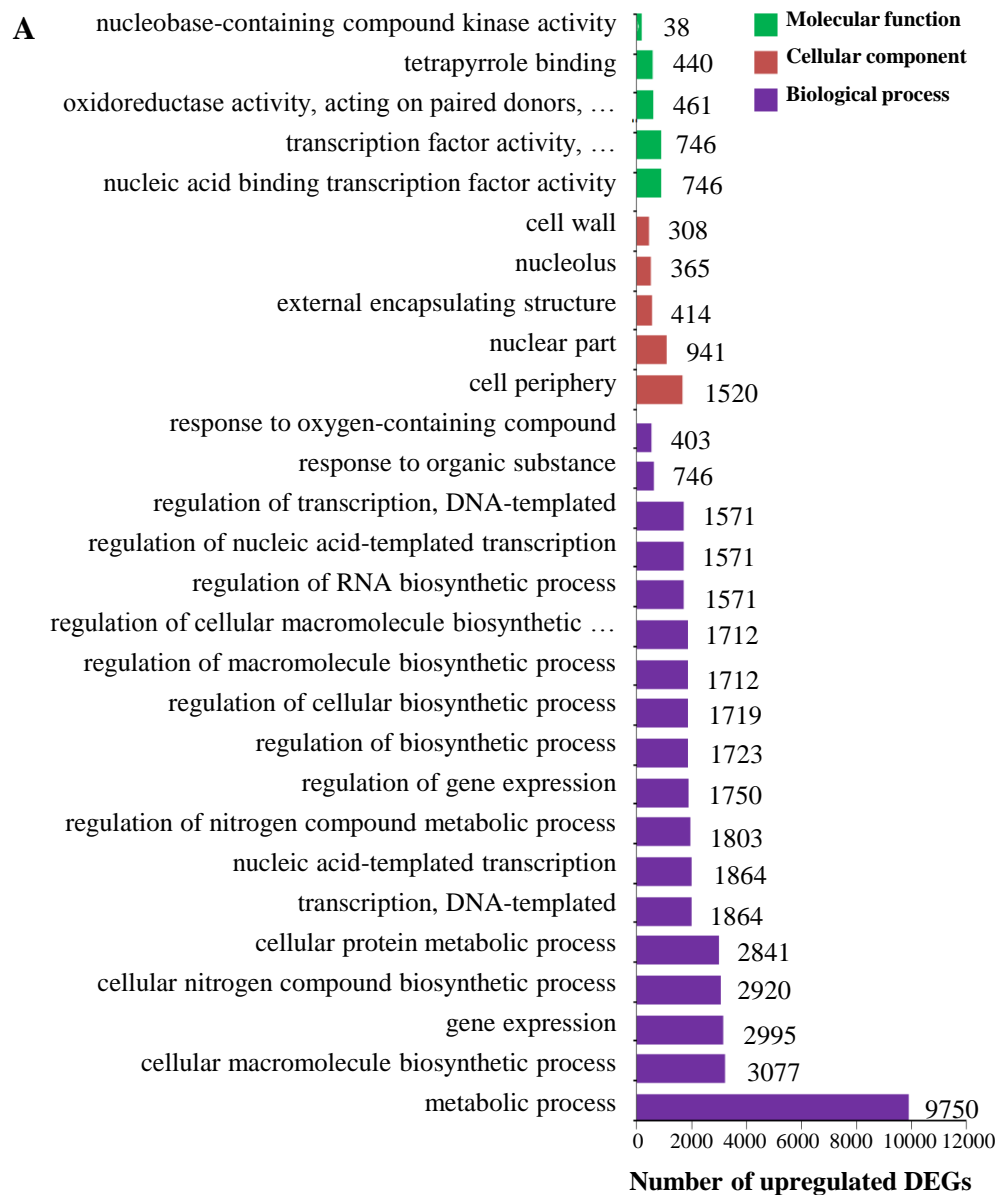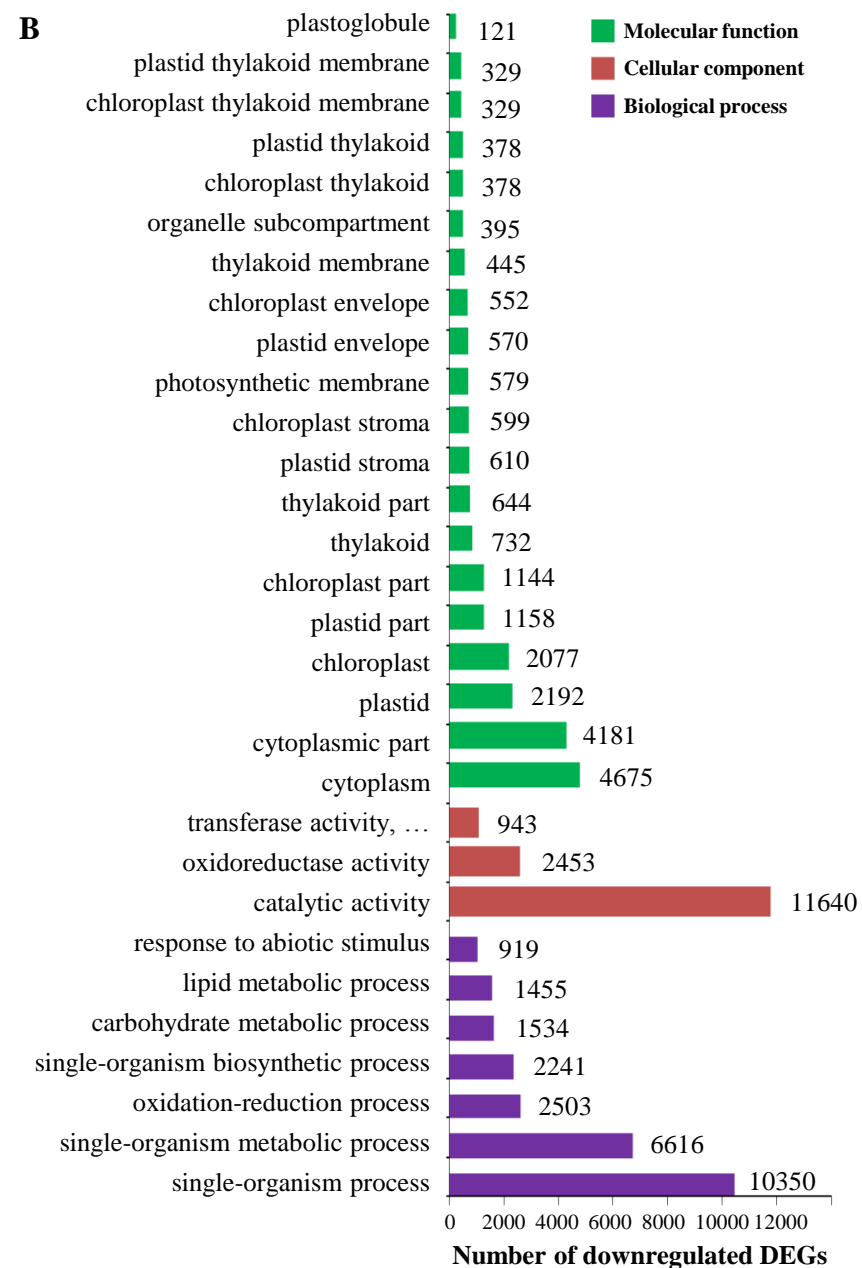

**Figure S3.** Assignment to Gene Ontology (GO) categories of differentially expressed genes (DEGs) of susceptible sugarcane cultivar ROC20 infected by *X. albilineans*. (A) Upregulated DEGs, (B) Downregulated DEGs.
