# Supplementary material for: Comparative Transcriptome Profiling of Resistant and Susceptible Sugarcane Cultivars in Response to Infection by Xanthomonas albilineans
Source: MDPI journal article supplement (doi:10.3390/ijms20246138), 2019-12-05
Supplement: s1 [file s1]

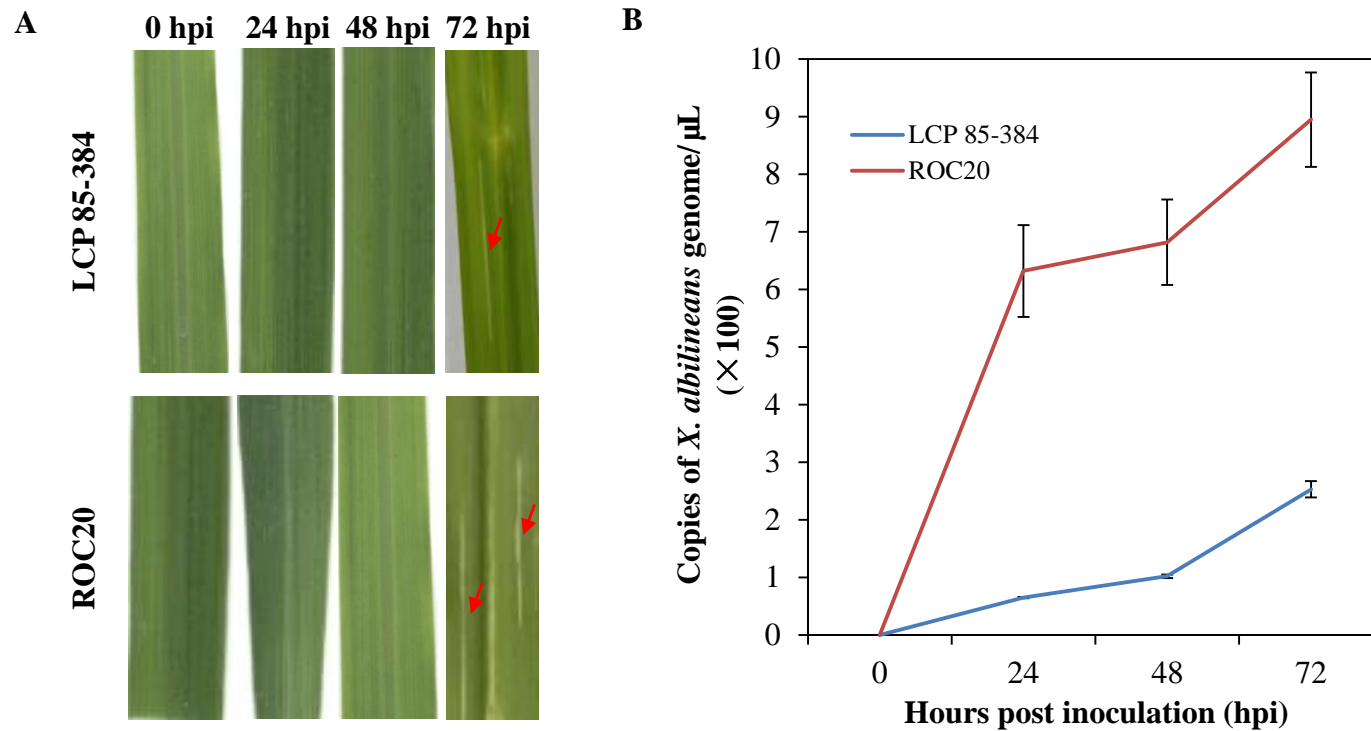

**Figure S1** Leaf scald symptoms observed in the resistant (LCP 85-384) and susceptible (ROC20) sugarcane cultivars after inoculation with *X. albilineans* (strain Xa-FJ1). (A) Pencil line streak (red arrow); (B) Quantification of *X. albilineans* populations in sugarcane cultivars using a real-time quantitative PCR (qPCR) assay. Inoculated plants collected at each time-point were distributed into three equal amounts of leaves for RNA-seq and qPCR. 0 hpi = mock (inoculated with sterile medium). Data at each time-point correspond to three biological replicates and three technical replicates.
